# Supplementary material
Source: publisher site journal article supplement (https://www.dovepress.com/article/462698)
Supplement: Supplementary file 1 [file get_supplementary_file.php]

­

**Modelling the Costs of Sublingual Immunotherapy versus Subcutaneous Immunotherapy Based on Clinical Appointments and Impacts of Patient Travel in Sweden**

Lars-Olaf Cardell1† (Orchid: 0000-0003-0538-9580), Thomas Sterner2† (ORCiD: 0000-0003-4771-3545), Waqas Ahmed3(ORCiD: 0000-0002-9035-7614),Andreas Kallsoy Slættanes4, Mikael Svärd5, Richard F. Pollock3, *(ORCiD: 0000-0002-9873-7507)

1 Division of ENT Diseases, Department of Clinical Science, Intervention and Technology, Karolinska Institute, Stockholm, Sweden

2 Department of Economics, School of Business, Economics and Law, University of Gothenburg, Gothenburg, Sweden

3Covalence Research Ltd, Harpenden, UK

4ALK, Bøge Allé 1, DK-2970, Hørsholm, Denmark

5ALK Nordic, Faktorvägen 9, SE-434 21, Kungsbacka, Sweden

† These authors contributed equally to this work and share first authorship

*Correspondence

Name: Richard F. Pollock

E-mail: [pollock@covalence-research.com](mailto:pollock@covalence-research.com)

**Supplementary materials**


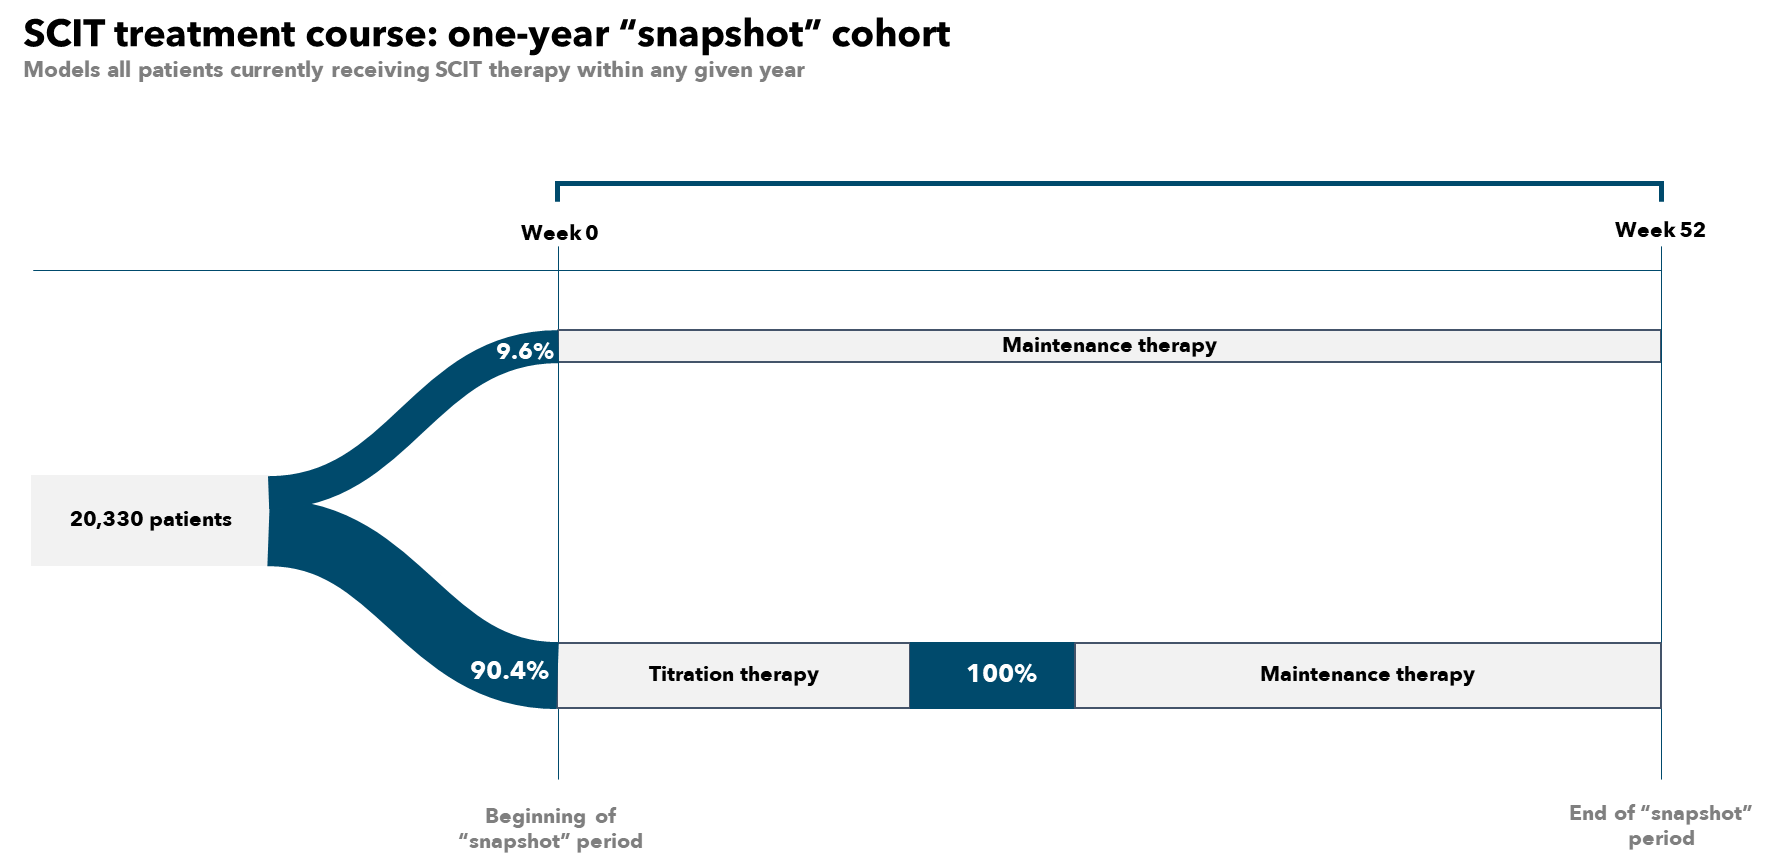
­

**Supplementary Figure S1.** SCIT treatment funnel for one-year "snapshot" cohort.


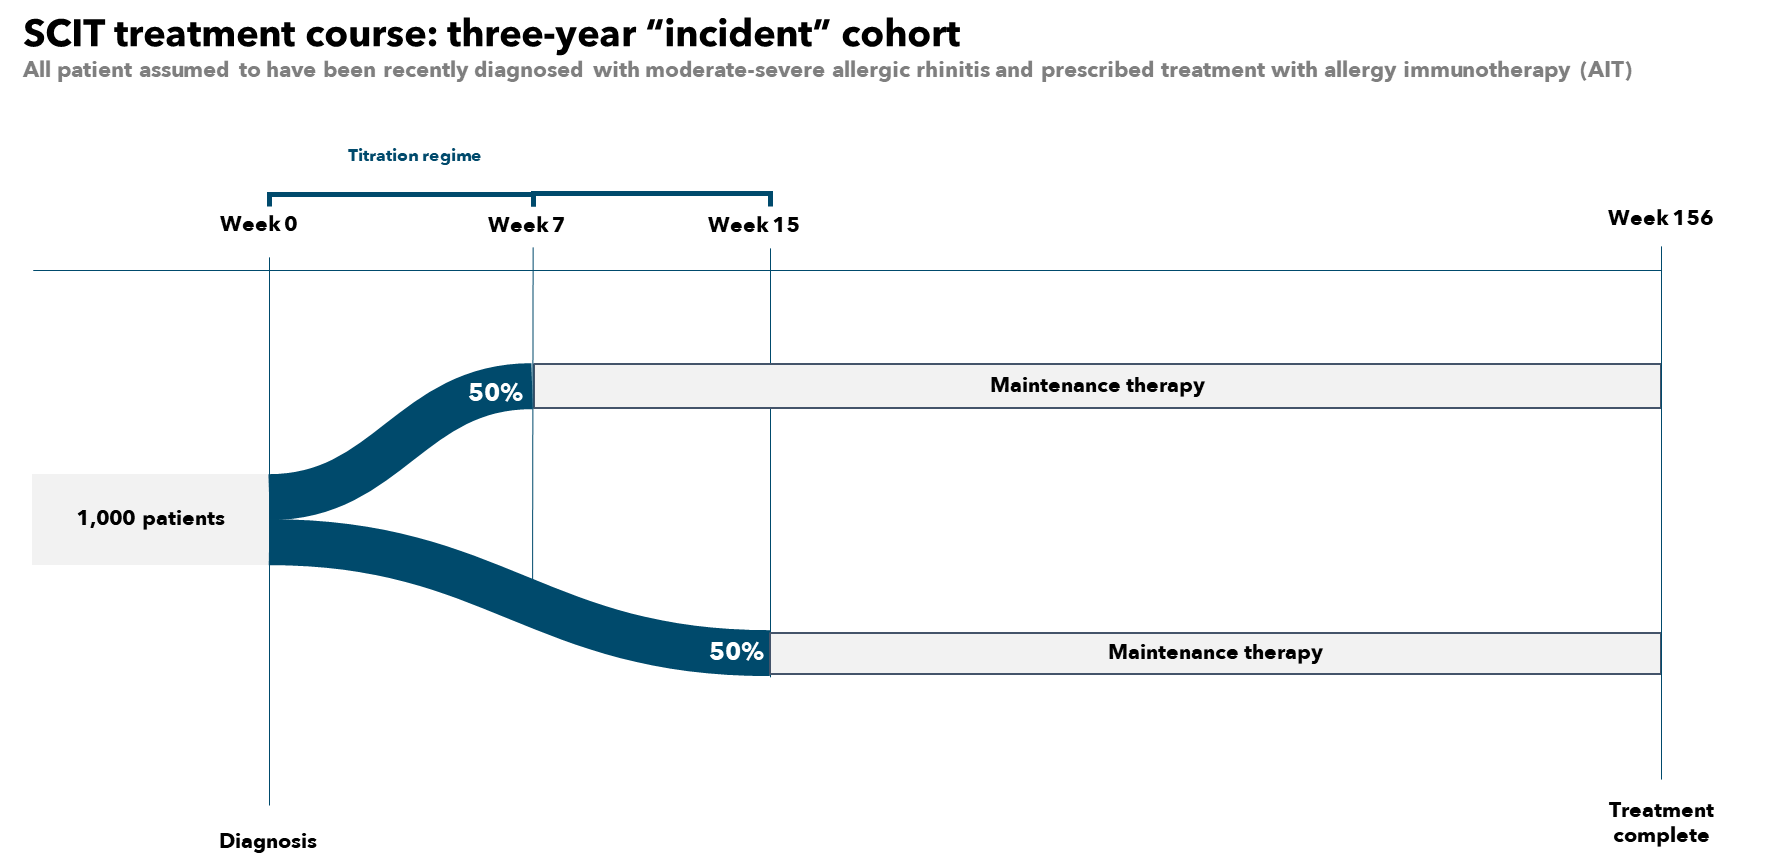


**Supplementary Figure S2.** SCIT treatment funnel for three-year “incident” cohort.
